# Supplementary material
Source: HighWire-hosted journal article supplement (http://cmajopen.ca/highwire/filestream/84937/field_highwire_adjunct_files/1/2020-0183-2-at.pdf)
Supplement: 2020-0183-2-at.pdf [file 2020-0183-2-at.pdf]

Appendix 2. Chart abstraction template used for the manual data extraction of heart failure among those with a diagnosis of chronic obstructive pulmonary disease

|                                                                              |                                                                                                                                             |
|------------------------------------------------------------------------------|---------------------------------------------------------------------------------------------------------------------------------------------|
| Elements collected                                                           |                                                                                                                                             |
| Physician diagnosis in EMR of Heart Failure (HF)                             | Yes/No/Uncertain                                                                                                                            |
| Physician speciality reporting HF diagnosis in EMR                           | Family physician, cardiologist, other                                                                                                       |
| Signs and symptoms                                                           | Dyspnea/Orthopnea/PND<br>Peripheral Edema<br>Elevated JVP<br>Respiratory findings                                                           |
| BNP > 50                                                                     | Yes/No and Value                                                                                                                            |
| NT-pro BNP >125                                                              | Yes/No and Value                                                                                                                            |
| ECHO                                                                         | Moderate/Severe LV systolic dysfunction<br>Moderate/Severe LV diastolic dysfunction<br>Severe valve abnormality<br>LVEF % (lowest reported) |
| MUGA                                                                         | LVEF                                                                                                                                        |
| Cardiac MRI                                                                  | LVEF                                                                                                                                        |
| Medication Hx                                                                | ACEi/ARB, Beta-blocker, aldosterone antagonist, Ivabradine, Diuretic (loop or thiazide), Hydralazine, Nitrate, Sacubitril-valsartan         |
| Implantable Cardiac Defibrillator or Hx of Cardiac Resynchronization therapy | Yes/No                                                                                                                                      |
